# Supplementary material for: Cardiac injury of the newborn mammalian heart accelerates cardiomyocyte terminal differentiation
Source: PubMed Central journal article supplement (PMC5567176; doi:10.1038/s41598-017-08947-2), 2017-08-21

1 **Supplementary Information for**

2  
3 **Cardiac injury of the newborn mammalian heart**  
4 **accelerates**  
5 **cardiomyocyte terminal differentiation**  
6

7 David C. Zebrowski, Charlotte H. Jensen, Robert Becker, Fulvia Ferrazzi, Christina Baun,  
8 Svend Hvidsten, Søren P. Sheikh, Brian D. Polizzotti, Ditte C. Andersen, Felix B. Engel  
9

10 **Content:**

- 11 1) Supplementary Figure Legends  
12 2) Supplementary Figure 1  
13 3) Supplementary Figure 2  
14 4) Supplementary Figure 3  
15 5) Supplementary Figure 4  
16 6) Supplementary Figure 5

1 **Supplementary Figure Legends**

2 **Supplementary Figure 1: Effect of AR on nuclear localization of pericentrin. (a, b)**

3 Representative images of cryosections of P3 rat heart ventricles. red/cyan: cardiomyocytes  
4 (nuclei: Nkx2.5; cytoplasmic membrane: caveolin 3), green: pericentrin (pericentriolar  
5 matrix/centrosome), blue: nuclei (DAPI). Dotted circle: vessel. Arrows: examples of  
6 cardiomyocytes with pericentrin localized to the nucleus. Scale bars: a: 25  $\mu$ m, b: 10  $\mu$ m. (a)  
7 Note: 1: Non-myocyte with pericentrin localized to its centrosome (asterisk). 2:  
8 Cardiomyocyte with pericentrin localized to its centrosome. 3: Cardiomyocyte with  
9 pericentrin localized to the nucleus (arrow). (c) Quantitative analysis of cardiomyocytes  
10 proximal (within 1 mm) to base or apex/resection with nuclear pericentrin signal from  
11 cryosections of P3 or P6 (SHAM and AR) rat hearts. Data are  $\pm$  SD. p-values were calculated  
12 using two-tailed Student's t-test.

13

14 **Supplementary Figure 2: Gross morphology of AR mouse hearts.** Representative

15 stereomicroscopic images of SHAM- and AR-operated mouse hearts at different postnatal  
16 time points. Arrow heads indicate myocardial scar. Scale bars: 1 mm.

17

18 **Supplementary Figure 3: Analysis of H3P-positive cardiomyocytes in AR rat hearts.**

19 Representative immunofluorescence images of sham- and AR-operated P6 rat hearts (scale  
20 bars: 1 mm). Red: cardiomyocytes (sarcomeric- $\alpha$ -actinin); green: mitotic cells (H3P); blue:  
21 nuclei (DAPI).

22

23 **Supplementary Figure 4: Characterization of P1 cardiomyocyte cytokinesis *in vivo*.**

24 Representative images of rat heart sections stained for cytokinesis proteins Aurora B (purple)  
25 and Anillin (green) and cardiomyocytes (Troponin I, red). Nuclei were visualized with DAPI  
26 (blue). (a) Representative images of P1 SHAM rat cardiomyocytes exhibiting Anillin patterns

1 associated with “normal” cytokinesis. **(b)** Representative images of P1 SHAM rat  
2 cardiomyocytes exhibiting Anillin patterns associated with “abnormal” cytokinesis. Scale  
3 bars: 10  $\mu\text{m}$ .

4

5 **Supplementary Figure 5: Hypothetical model for the amount of H3P events to support**  
6 **proliferation along-side of binucleation after AR.** **(a)** SHAM, binucleation with no  
7 proliferation. Experimental data: binucleation at P5 = 20%. The number of H3P events at P3  
8 = 1-fold. **(b)** AR, binucleation with no proliferation. Experimental data: binucleation at P5 =  
9 30%. The number of H3P events at P3 = 2-fold. **(c, d)** Assumption: all **(c)** or the additional **(d)**  
10 H3P events after AR indicate proliferation. This would result in a decrease in the binucleation  
11 rate which has not been observed. **(e)** Any significant increase in proliferation induced by AR  
12 requires a significant increase in binucleation and thus a higher fold-increase in H3P-positive  
13 cardiomyocytes than observed. P: postnatal day. Dashed arrows: no cell cycle activity from  
14 P3 to P5. Green arrows: mitosis (i.e. H3P event) from P3 to P5. Note, it is known that H3P  
15 events post-P3 are strictly followed by binucleation during normal (i.e. SHAM) neonatal heart  
16 development.

Zebrowski DC *et al.*, Figure S1

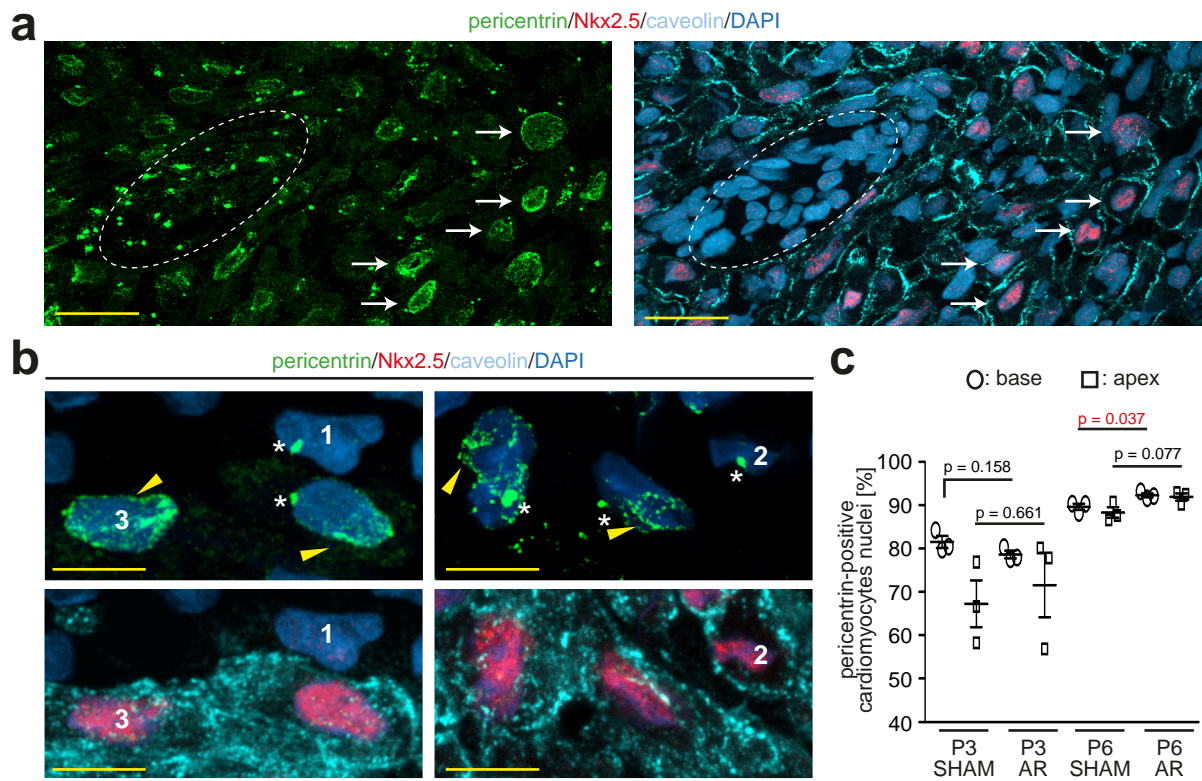

Zebrowski DC *et al.*, Figure S2

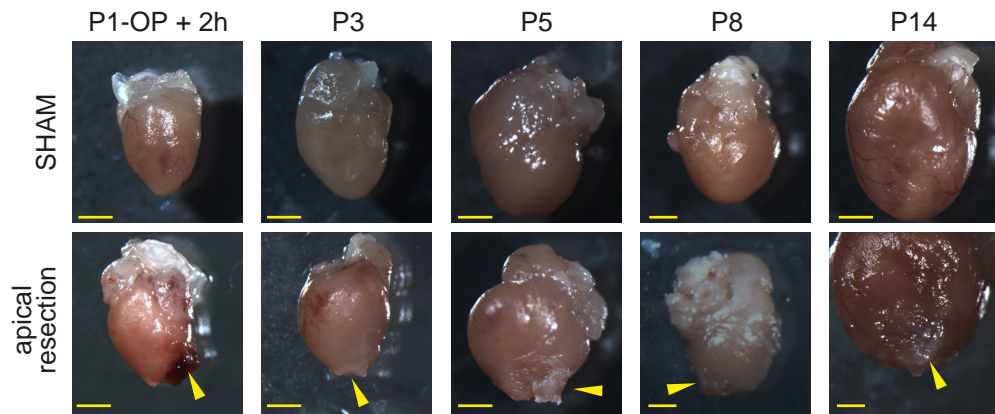

Zebrowski DC et al., Figure S3

H3P/Actinin/DAPI

SHAM

apical resection

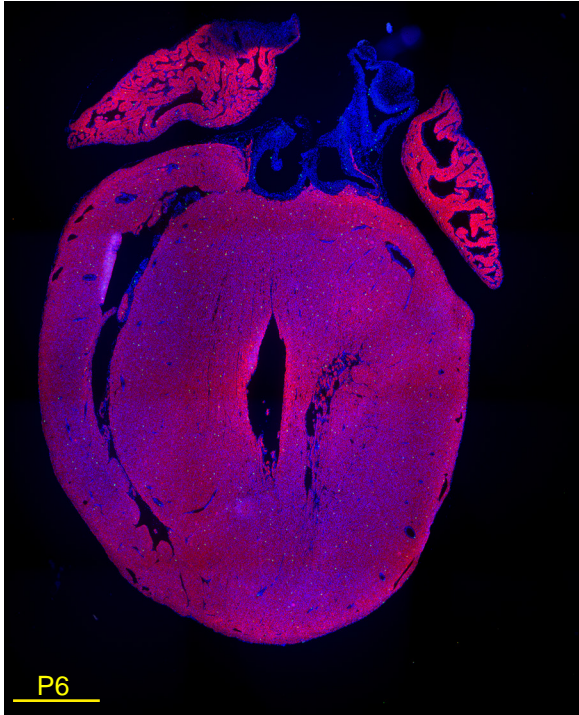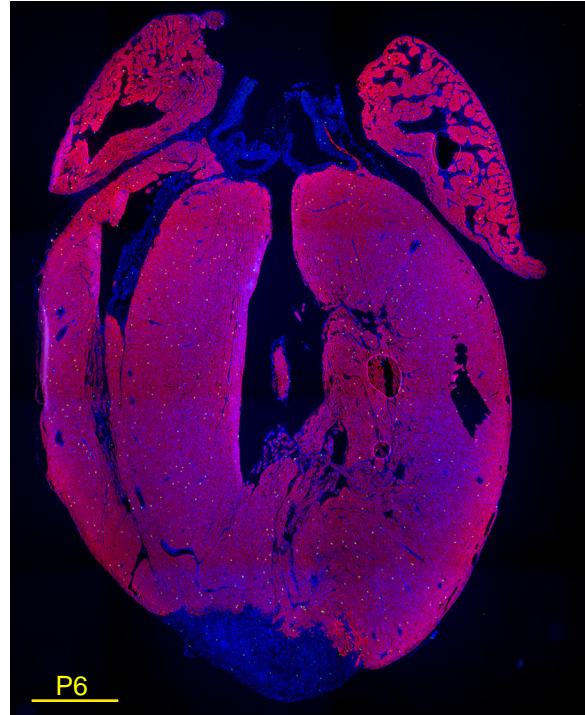

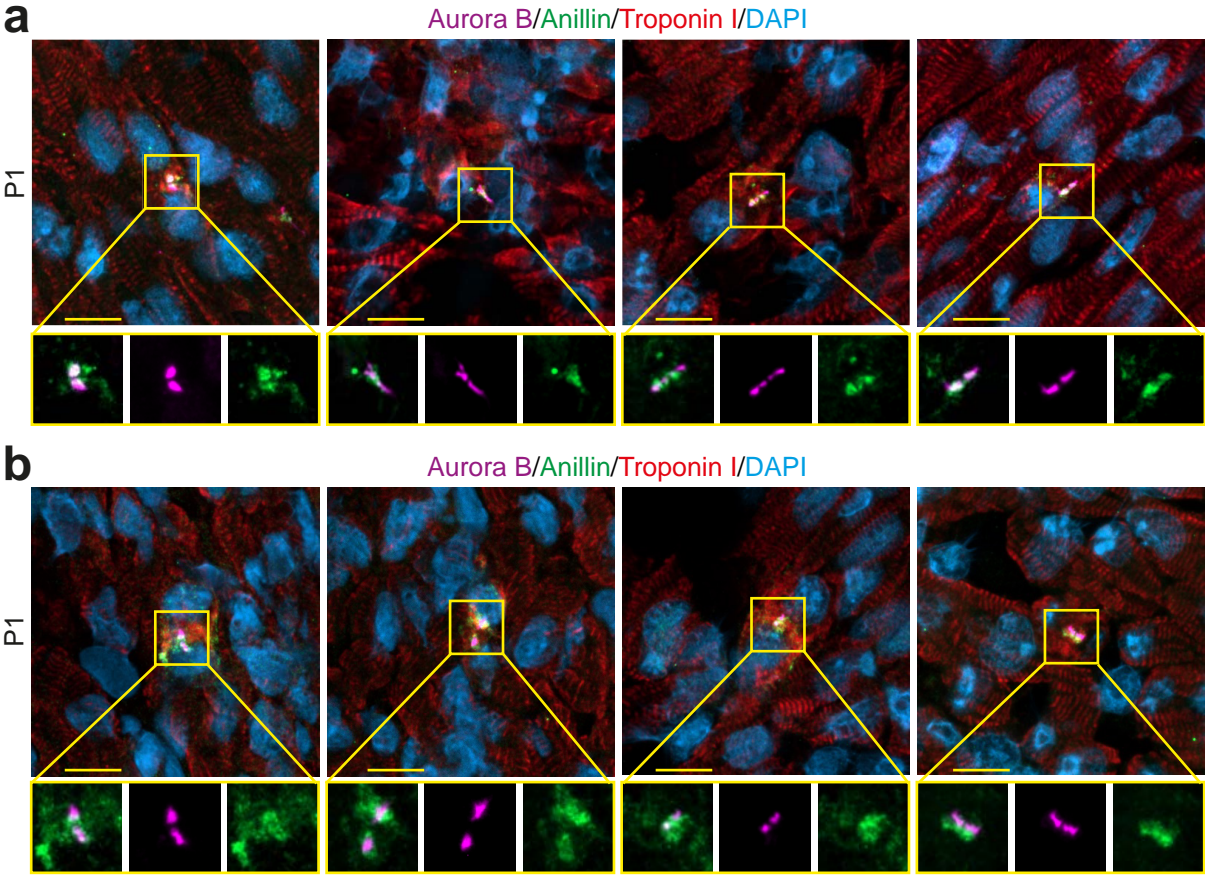

# Zebrowski DC *et al.*, Figure S5

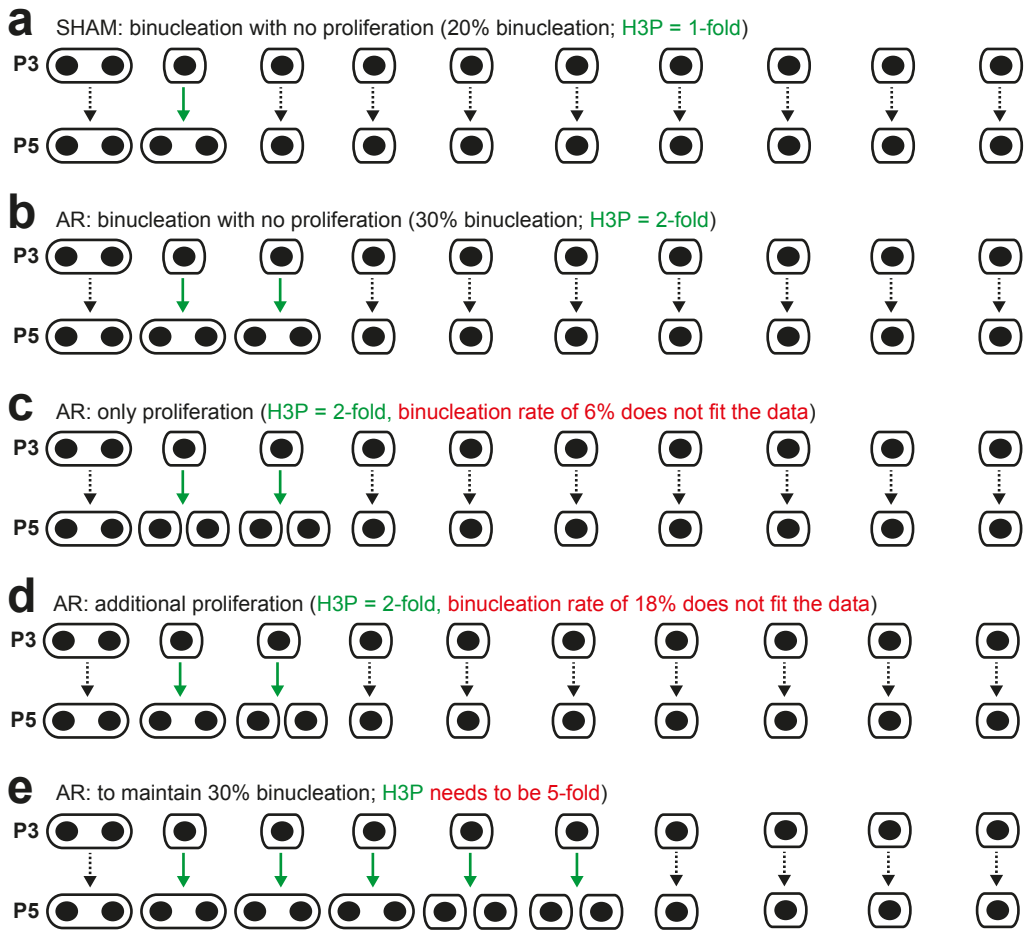

Supplement: 41598_2017_8947_MOESM1_ESM.pdf [file 41598_2017_8947_MOESM1_ESM.pdf]
